# Supplementary material for: Monomeric alkoxide and alkylcarbonate complexes of nickel and palladium stabilized with the iPrPCP pincer ligand: a model for the catalytic carboxylation of alcohols to alkyl carbonates
Source: Royal Society of Chemistry journal article supplement (doi:10.1039/c8dt04919j), 2018-12-17
Supplement: c8dt04919j1.pdf [file c8dt04919j1.pdf]

Electronic Supporting Information

**Monomeric Alkoxide and Alkylcarbonate Complexes of Nickel and Palladium  
Complexes Stabilized with a<sup>iPr</sup>PCP Pincer Ligand: A Model for the Catalytic  
Carboxylation of Alcohols to Alkyl Carbonates**

Luis M. Martínez-Prieto, Pilar Palma, and Juan Cámpora\*

***Instituto de Investigaciones Químicas***

*CSIC - Universidad de Sevilla. C/ Américo Vespucio, 49. 41092, Seville, Spain.*

## Kinetic data for the reactions of Methylcarbonate Complexes (**9a/b**) Complexes with Alkylating Agents

Table S1 collects the data corresponding to the reactions of **9a** and **9b** with MeI and MeOTs (Eq. S1). The consumption of the Ni or Pd complex is represented as the molar fraction ( $f_{[9]}$ ), calculated from the intensities of the  $^{31}\text{P}\{^1\text{H}\}$  signals of the starting ( $I_{[9]}$ ) and product ( $I_{[15]}$  or  $I_{[17]}$ ) complexes, as shown in eq. S2. In the calculation of first-order rate constants, the molar fraction can be used directly, but for half-order rate constants,  $f_{[9]}$  are to be converted into absolute concentrations multiplying by the initial concentration of the starting complex ( $C_0 = 0.041 \text{ M}$ ) (Eq. S3). The expressions used for the first and half-order kinetics are shown in Eqs S4 and S5.

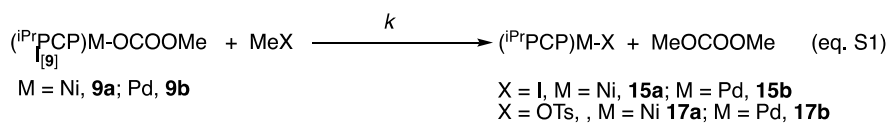

$$f_{[9]} = \frac{I_{[9]}}{I_{[9]} + I_{[15]}} \quad \text{or} \quad \frac{I_{[9]}}{I_{[9]} + I_{[17]}} \quad (\text{eq. S2})$$

$$\text{at any } t, [\mathbf{9}] = C_0 \cdot f_{[9]} = 0.041 \cdot f_{[9]} \quad (\text{eq. S3})$$

$$\text{first order kinetics: } \ln \frac{f_{[9]} \text{ at } t=0}{f_{[9]} \text{ at } t} = k \cdot t \quad (\text{eq. S4})$$

$$\text{half-order kinetics: } \sqrt{[\mathbf{9}] \text{ at } t=0} - \sqrt{[\mathbf{9}] \text{ at } t} = 1/2 k \cdot t \quad (\text{eq. S5})$$

**Table S1.** Kinetic data.

| <b>MeX = Iodomethane</b> |            |              |            |              |               |               |            |               |            |
|--------------------------|------------|--------------|------------|--------------|---------------|---------------|------------|---------------|------------|
| <b>M = Ni</b>            |            |              |            |              | <b>M = Pd</b> |               |            |               |            |
| [MeI]/Ni= 10             |            | [MeI]/Ni= 15 |            | [MeI]/Ni= 20 |               | [MeI]/Pd = 10 |            | [MeI]/Pd = 20 |            |
| t(s)                     | $f_{[9a]}$ | t(s)         | $f_{[9a]}$ | t(s)         | $f_{[9a]}$    | t(s)          | $f_{[9b]}$ | t(s)          | $f_{[9b]}$ |
| 0                        | 0,848      | 0            | 0,958      | 0            | 0,966         | 0             | 0,663      | 0             | 1,000      |
| 1800                     | 0,784      | 1800         | 0,681      | 900          | 0,563         | 1500          | 0,571      | 600           | 0,441      |
| 3600                     | 0,734      | 3600         | 0,425      | 1800         | 0,367         | 3000          | 0,510      | 1200          | 0,206      |
| 5400                     | 0,689      | 5400         | 0,206      | 2700         | 0,231         | 4500          | 0,435      | 2640          | 0,057      |
| 7200                     | 0,649      | 7200         | 0,065      | 3600         | 0,130         | 6000          | 0,383      |               |            |
| 9000                     | 0,606      |              |            | 4500         | 0,057         | 7500          | 0,329      |               |            |
| 10800                    | 0,565      |              |            | 5400         | 0,020         | 9000          | 0,275      |               |            |
| 12600                    | 0,522      |              |            |              |               | 10500         | 0,248      |               |            |
| 14400                    | 0,471      |              |            |              |               | 12000         | 0,200      |               |            |
| 16200                    | 0,429      |              |            |              |               | 13500         | 0,180      |               |            |
| 18000                    | 0,379      |              |            |              |               | 15000         | 0,138      |               |            |
| 19800                    | 0,342      |              |            |              |               | 16500         | 0,115      |               |            |
| 21600                    | 0,301      |              |            |              |               | 18000         | 0,099      |               |            |
| 23400                    | 0,265      |              |            |              |               | 19500         | 0,074      |               |            |
| 25200                    | 0,225      |              |            |              |               | 21000         | 0,057      |               |            |
| 27000                    | 0,187      |              |            |              |               | 22500         | 0,048      |               |            |
| 28800                    | 0,160      |              |            |              |               | 24000         | 0,038      |               |            |
| 30600                    | 0,130      |              |            |              |               | 25500         | 0,029      |               |            |
| 32400                    | 0,099      |              |            |              |               |               |            |               |            |
| 34200                    | 0,074      |              |            |              |               |               |            |               |            |
| 36000                    | 0,057      |              |            |              |               |               |            |               |            |
| 37800                    | 0,038      |              |            |              |               |               |            |               |            |
| 39600                    | 0,020      |              |            |              |               |               |            |               |            |
| 41400                    | 0,010      |              |            |              |               |               |            |               |            |

  

| <b>MeX = Methyl tosylate</b> |            |              |            |               |            |               |            |               |            |
|------------------------------|------------|--------------|------------|---------------|------------|---------------|------------|---------------|------------|
| [MeI]/Ni= 10                 |            | [MeI]/Ni= 20 |            | [MeI]/Pd = 10 |            | [MeI]/Pd = 20 |            | [MeI]/Pd = 20 |            |
| t(sec)                       | $f_{[9a]}$ | t(sec)       | $f_{[9a]}$ | t(sec)        | $f_{[9b]}$ | t(sec)        | $f_{[9b]}$ | t(sec)        | $f_{[9b]}$ |
| 0                            | 0,968      |              |            | 0             | 0,934      | 0             | 0,958      | 0             | 0,722      |
| 1800                         | 0,899      |              |            | 1800          | 0,805      | 19800         | 0,670      | 1800          | 0,512      |
| 70200                        | 0,524      |              |            | 3600          | 0,722      | 88200         | 0,359      | 3600          | 0,408      |
| 97200                        | 0,462      |              |            | 5400          | 0,668      | 99000         | 0,329      | 5400          | 0,333      |
| 154800                       | 0,338      |              |            | 7200          | 0,615      | 172800        | 0,194      | 7200          | 0,270      |
| 172800                       | 0,329      |              |            | 9000          | 0,574      | 189000        | 0,180      | 9000          | 0,225      |
| 241200                       | 0,248      |              |            | 10800         | 0,541      | 255600        | 0,115      | 10800         | 0,187      |
| 262800                       | 0,225      |              |            | 12600         | 0,507      | 270000        | 0,099      | 12600         | 0,167      |
| 414000                       | 0,083      |              |            | 14400         | 0,479      |               |            | 14400         | 0,130      |
| 432000                       | 0,074      |              |            | 16200         | 0,457      |               |            | 16200         | 0,107      |
| 507600                       | 0,057      |              |            | 18000         | 0,435      |               |            | 18000         | 0,091      |
| 525600                       | 0,048      |              |            | 19800         | 0,415      |               |            | 19800         | 0,074      |
| 590400                       | 0,038      |              |            | 21600         | 0,398      |               |            | 21600         | 0,065      |
| 612000                       | 0,029      |              |            | 23400         | 0,379      |               |            | 23400         | 0,057      |
| 763200                       | 0,010      |              |            | 25200         | 0,363      |               |            | 25200         | 0,038      |
|                              |            |              |            | 27000         | 0,346      |               |            | 27000         | 0,029      |
|                              |            |              |            | 28800         | 0,333      |               |            |               |            |
|                              |            |              |            | 30600         | 0,315      |               |            |               |            |
|                              |            |              |            | 32400         | 0,306      |               |            |               |            |
|                              |            |              |            | 34200         | 0,291      |               |            |               |            |
|                              |            |              |            | 36000         | 0,281      |               |            |               |            |
|                              |            |              |            | 37800         | 0,270      |               |            |               |            |
|                              |            |              |            | 39600         | 0,259      |               |            |               |            |
|                              |            |              |            | 41400         | 0,248      |               |            |               |            |

**Table S2.** DFT (PBE functional, CPCM = benzene) SCF Energies and Free Energies (Kcal·mol<sup>-1</sup>)

| <b>Molecule</b>                              | <b>6-31G*</b> |                |        |                 | <b>6-311++G(3df, 2p)</b> |              | <b>Corrected</b>         |  |
|----------------------------------------------|---------------|----------------|--------|-----------------|--------------------------|--------------|--------------------------|--|
|                                              | E (SCF)       | G <sup>o</sup> | ZPE    | TC <sup>a</sup> | E' (SCF)                 | E = E' + ZPE | G <sup>o</sup> = E' + TC |  |
| [Ni]-OCOOH                                   | -2031020,72   | -2030732,38    | 330,77 | 288,34          | -2030732,38              | -2031093,29  | -2031135,72              |  |
| [Ni]-OCOOMe                                  | -2055647,64   | -2055344,13    | 347,79 | 303,51          | -2055344,13              | -2055706,28  | -2055750,56              |  |
| [Ni]-OCOOEt                                  | -2080284,53   | -2079964,89    | 365,22 | 319,64          | -2079964,89              | -2080332,93  | -2080378,51              |  |
| [Ni]-OCOOCH <sub>2</sub> CH <sub>2</sub> OMe | -2152061,32   | -2151722,77    | 386,01 | 338,55          | -2151722,77              | -2152115,85  | -2152163,31              |  |

|                                              |             |             |        |        |             |             |             |
|----------------------------------------------|-------------|-------------|--------|--------|-------------|-------------|-------------|
| [Pd]-OCOOH                                   | -1164325,92 | -1164039,97 | 329,91 | 285,95 | -1164039,97 | -1165014,93 | -1165058,89 |
| [Pd]-OCOOMe                                  | -1188952,68 | -1188651,07 | 347,09 | 301,61 | -1188651,07 | -1189627,82 | -1189673,30 |
| [Pd]-OCOOEt                                  | -1213589,54 | -1213271,46 | 365,22 | 318,08 | -1213271,46 | -1214253,67 | -1214300,81 |
| [Pd]-OCOOCH <sub>2</sub> CH <sub>2</sub> OMe | -1285366,40 | -1285030,70 | 384,95 | 335,7  | -1285030,70 | -1286037,55 | -1286086,80 |

**Data taken from ref 18e**

|                                           |             |             |        |        |             |             |             |
|-------------------------------------------|-------------|-------------|--------|--------|-------------|-------------|-------------|
| [Ni]-OH                                   | -1912784,89 | -1912503,41 | 320,81 | 281,48 | -1912503,41 | -1912824,94 | -1912864,27 |
| [Ni]-OMe                                  | -1937407,29 | -1937109,14 | 338,44 | 298,15 | -1937109,14 | -1937434,29 | -1937474,58 |
| [Ni]-OEt                                  | -1962044,96 | -1961730,25 | 356,27 | 314,71 | -1961730,25 | -1962060,73 | -1962102,29 |
| [Ni]-OCH <sub>2</sub> CH <sub>2</sub> OMe | -2033822,65 | -2033491,89 | 375,92 | 330,76 | -2033491,89 | -2033845,29 | -2033890,45 |
| [Pd]-OH                                   | -1046086,22 | -1045805,36 | 320,58 | 280,86 | -1045805,36 | -1046743,93 | -1046783,65 |
| [Pd]-OMe                                  | -1070711,70 | -1070413,49 | 338,57 | 298,21 | -1070413,49 | -1071355,31 | -1071395,67 |
| [Pd]-OEt                                  | -1095349,42 | -1095035,19 | 356,11 | 314,23 | -1095035,19 | -1095982,15 | -1096024,03 |
| [Pd]-OCH <sub>2</sub> CH <sub>2</sub> OMe | -1167126,71 | -1166796,67 | 375,67 | 330,04 | -1166796,67 | -1167766,65 | -1167812,28 |

---

(a) Thermal correction (TC = G° (6-31G\*) – E (6-31G\*))

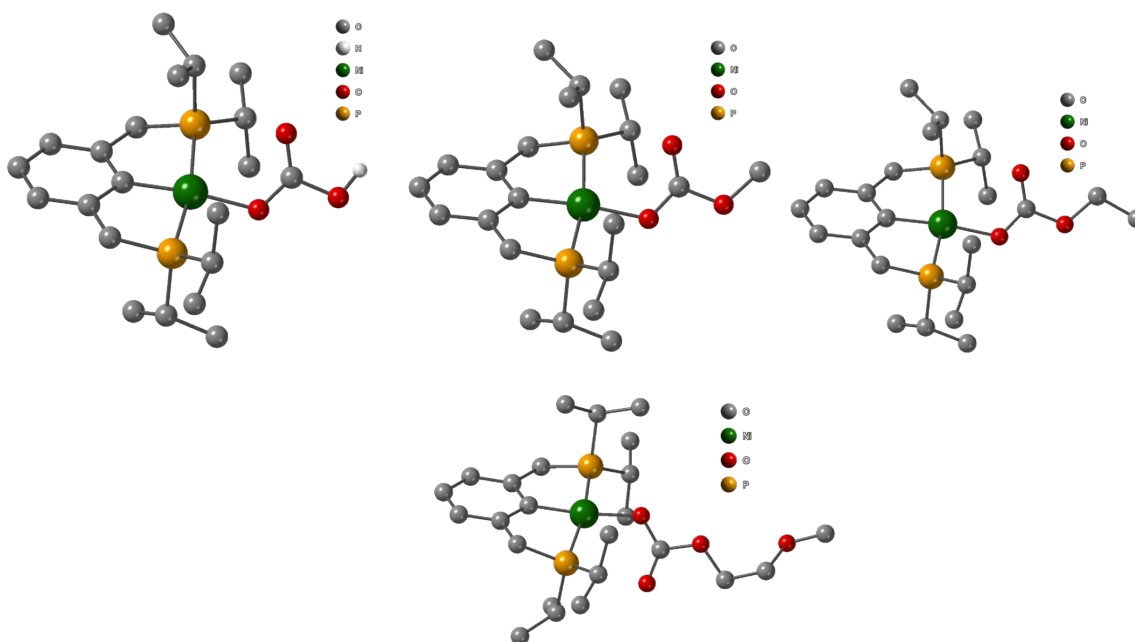

**Figure S1.** Molecular drawings for optimized geometries of nickel bicarbonate and alkylcarbonate complexes. Hydrogen atoms (except those of bicarbonate) have been omitted for simplicity. From left to right: [Ni]-OCOOH, [Ni]-OCOOEt, [Ni]-OCOOEt; below [Ni]-OCOOH.

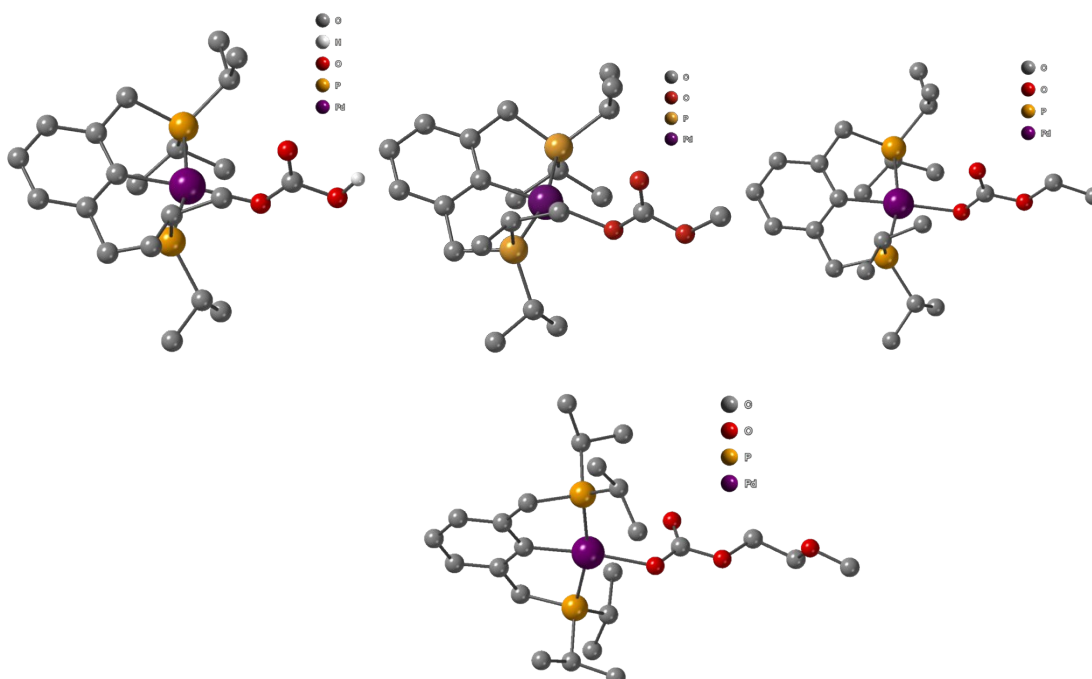

**Figure S2.** Molecular drawings for optimized geometries of palladium bicarbonate and alkylcarbonate complexes. Hydrogen atoms (except those of bicarbonate) have been omitted for simplicity. From left to right: [Pd]-OCOOH, [Pd]-OCOOEt, [Pd]-OCOOEt; below [Pd]-OCOOH.

**Table S3.** Molecular coordinates for bicarbonate and alkylcarbonate complexes.**[Ni]-OCOOH**

63

H -0.601798 -3.592753 3.689475  
H 0.019111 -3.231864 2.053359  
H 3.572601 -2.962708 -1.720739  
O 2.878334 -3.076483 -1.036240  
C -1.112470 1.774190 1.612953  
C -0.075173 1.410025 2.654764  
C 2.271006 -0.467449 2.704833  
C 3.148934 0.500127 1.893573  
C 2.474253 -0.309103 4.217575  
C -0.498600 -1.466022 3.244851  
C 0.033236 -2.901956 3.106245  
C -1.988022 -1.379907 2.874236  
C 2.199902 -1.871992 -1.037529  
H -2.025175 3.322042 2.824636  
H 2.531409 -1.498544 2.399177  
H -0.366052 -1.125402 4.291007  
H -0.463108 1.462628 3.688629  
H 0.803062 2.082289 2.604859  
H 2.922822 1.554375 2.133845  
H 3.006290 0.358059 0.808658  
H 4.215095 0.328037 2.125882  
H 3.539755 -0.451478 4.475192  
H 1.890607 -1.043984 4.797099  
H 2.183612 0.701383 4.556562  
H 1.066767 -3.002515 3.477755  
H -2.143103 -1.707887 1.831487  
H -2.382857 -0.354328 2.959363  
H -2.578819 -2.037531 3.537025  
Ni 0.121932 -0.323678 0.044115  
O 1.243879 -1.869414 -0.163923  
P 0.486298 -0.287599 2.170291  
C -0.413147 -1.414920 -3.215279  
C -0.996560 -1.105213 -4.603364  
C -1.157962 -2.578358 -2.537212  
H 0.652028 -1.690230 -3.323417  
H -1.026071 -2.030780 -5.207068  
H -2.233523 -2.354755 -2.418291  
H -0.736717 -2.793667 -1.541797  
H -1.078102 -3.490146 -3.156072

C -1.105224 1.050881 0.380823  
C -2.047483 2.793439 1.863739  
C -2.997985 3.140645 0.893744  
C -3.015702 2.454701 -0.329164  
C -2.093228 1.425047 -0.581627  
C -2.108266 0.661252 -1.887329  
C 0.637746 1.392210 -2.888231  
C 1.403438 2.231506 -1.850897  
C -0.172786 2.299695 -3.826446  
H -3.721567 3.939218 1.090253  
H -3.756792 2.715530 -1.094436  
H -2.457756 1.264189 -2.743435  
H -2.765533 -0.228132 -1.826593  
H 1.380099 0.816493 -3.472007  
H 2.035975 2.976378 -2.368295  
H 2.050920 1.589307 -1.233077  
H 0.707959 2.770522 -1.185613  
H -0.871419 2.936992 -3.255556  
H -0.757779 1.742061 -4.575589  
H 0.515343 2.972734 -4.369643  
H -0.392744 -0.367765 -5.157063  
H -2.030296 -0.722696 -4.532438  
O 2.543126 -0.967212 -1.825965  
P -0.363716 0.040518 -2.041673

**[Ni]-OCOOMe**

66

H -0.817681 -3.425265 3.834697  
H -0.222146 -3.089844 2.184073  
O 2.702903 -2.930075 -0.942021  
C -1.309158 1.898810 1.698067  
C -0.256527 1.556725 2.730861  
C 2.078806 -0.328666 2.814289  
C 2.963832 0.625834 1.995207  
C 2.275339 -0.150793 4.325891  
C -0.696912 -1.305277 3.363751  
C -0.184642 -2.748798 3.232829  
C -2.188899 -1.203234 3.007414  
C 2.017919 -1.730278 -0.965296  
H -2.221988 3.457427 2.895885  
H 2.338420 -1.364107 2.523146

H -0.550729 -0.957856 4.405736  
H -0.626790 1.633682 3.769498  
H 0.621971 2.225586 2.650854  
H 2.744025 1.683939 2.224180  
H 2.823216 0.473714 0.911513  
H 4.028312 0.449557 2.232006  
H 3.340214 -0.286264 4.589800  
H 1.691841 -0.880384 4.912212  
H 1.979836 0.862866 4.651259  
H 0.854084 -2.857324 3.587297  
H -2.358787 -1.531727 1.967284  
H -2.571821 -0.173294 3.094516  
H -2.779912 -1.852603 3.678193  
Ni -0.066560 -0.206717 0.143163  
O 1.081428 -1.730764 -0.066088  
P 0.296298 -0.150455 2.271017  
C -0.573991 -1.237401 -3.178223  
C -1.207800 -0.870192 -4.528809  
C -1.255895 -2.458963 -2.538939  
H 0.496645 -1.466642 -3.328624  
H -1.170708 -1.741029 -5.208856  
H -2.326697 -2.268835 -2.342678  
H -0.773205 -2.728336 -1.585477  
H -1.195756 -3.325967 -3.221197  
C -1.308060 1.157929 0.477203  
C -2.250109 2.914070 1.943482  
C -3.213624 3.238808 0.978483  
C -3.237621 2.534888 -0.234220  
C -2.308060 1.510180 -0.480453  
C -2.317936 0.732307 -1.776400  
C 0.403311 1.582858 -2.749069  
C 1.227385 2.343364 -1.696639  
C -0.467694 2.555073 -3.562710  
H -3.941872 4.034229 1.170494  
H -3.987791 2.777891 -0.996473  
H -2.699749 1.312571 -2.634319  
H -2.940738 -0.179681 -1.696541  
H 1.105917 1.060803 -3.425554  
H 1.817954 3.138893 -2.187501  
H 1.918086 1.659595 -1.178632  
H 0.568582 2.811804 -0.946097  
H -1.192185 3.074606 -2.911867  
H -1.027833 2.059861 -4.372953

H 0.177590 3.326286 -4.021414  
H -0.681436 -0.037724 -5.023802  
H -2.268806 -0.585107 -4.414241  
O 2.322309 -0.831413 -1.773088  
P -0.553007 0.170063 -1.942932  
C 3.764119 -3.026847 -1.903954  
H 4.519148 -2.237738 -1.747661  
H 3.379411 -2.946174 -2.935106  
H 4.214224 -4.018444 -1.746467

### [Ni]-OCOOEt

69

H -3.906369 -3.213949 -1.003554  
H -2.261320 -2.874464 -0.394814  
O 0.873112 -2.720353 2.491184  
C -1.772582 2.112272 -1.517989  
C -2.808077 1.772416 -0.467221  
C -2.892870 -0.101409 1.876814  
C -2.073720 0.856271 2.758328  
C -4.404576 0.079009 2.070300  
C -3.436051 -1.093069 -0.894663  
C -3.310230 -2.532707 -0.370170  
C -3.070782 -1.003362 -2.385192  
C 0.886916 -1.513463 1.821793  
H -2.970939 3.664231 -2.441256  
H -2.603162 -1.136042 2.141461  
H -4.478367 -0.743022 -0.757090  
H -3.845747 1.845648 -0.841023  
H -2.732070 2.444826 0.409023  
H -2.301900 1.913545 2.533683  
H -0.990094 0.702593 2.618734  
H -2.311141 0.684843 3.823473  
H -4.670510 -0.052620 3.135158  
H -4.990817 -0.651668 1.488058  
H -4.728030 1.092120 1.770846  
H -3.674666 -2.633194 0.665936  
H -2.030507 -1.336078 -2.546126  
H -3.152278 0.024010 -2.776058  
H -3.739846 -1.655186 -2.975424  
Ni -0.218452 0.013012 -0.263450  
O -0.011161 -1.510588 0.883183  
P -2.346777 0.068293 0.094493  
C 3.096121 -1.026919 -0.762299  
C 4.453078 -0.669412 -1.388325  
C 2.453332 -2.244713 -1.447877

H 3.238740 -1.256891 0.309282  
H 5.124519 -1.546856 -1.351479  
H 2.275072 -2.057642 -2.522345  
H 1.489846 -2.501195 -0.978256  
H 3.124997 -3.118903 -1.373773  
C -0.550231 1.373808 -1.509962  
C -2.017240 3.122896 -2.464092  
C -1.049904 3.445675 -3.425968  
C 0.164479 2.744463 -3.442944  
C 0.410003 1.724258 -2.508239  
C 1.707404 0.948308 -2.512347  
C 2.675842 1.796744 0.211280  
C 1.620980 2.567572 1.022689  
C 3.505285 2.759816 -0.654677  
H -1.241452 4.237458 -4.158295  
H 0.928554 2.985807 -4.191802  
H 2.565735 1.529872 -2.891421  
H 1.631374 0.036309 -3.135710  
H 3.340632 1.271758 0.922761  
H 2.111773 3.361778 1.615069  
H 1.091868 1.889785 1.710958  
H 0.879571 3.038776 0.355559  
H 2.864883 3.284477 -1.384888  
H 4.315075 2.256550 -1.208266  
H 3.966387 3.527726 -0.007096  
H 4.953241 0.156245 -0.856302  
H 4.345830 -0.379073 -2.448654  
O 1.685485 -0.609015 2.135425  
P 1.868361 0.386606 -0.747064  
C 1.834684 -2.838134 3.563057  
H 1.648395 -2.047883 4.312868  
H 2.852785 -2.678951 3.163751  
C 1.679027 -4.227728 4.159291  
H 2.400223 -4.366794 4.982384  
H 1.866297 -5.004619 3.399073  
H 0.661962 -4.373875 4.560197

### [Ni]-OCOOCH<sub>2</sub>CH<sub>2</sub>OMe

73

H 1.282353 -3.923013 2.862709  
H 0.641550 -2.293339 2.507769  
O -2.223749 0.783230 2.353116  
C 1.843892 -1.790605 -2.473859  
C 0.815424 -2.849828 -2.137214

C -1.558412 -2.961127 -0.305920  
C -2.432479 -2.155678 -1.281988  
C -1.726284 -4.475867 -0.490388  
C 1.201607 -3.461106 0.738744  
C 0.648077 -3.343218 2.168218  
C 2.686708 -3.069724 0.676422  
C -1.573375 0.781969 1.132908  
H 2.805352 -2.976204 -4.011822  
H -1.848706 -2.675845 0.723249  
H 1.088860 -4.505964 0.387094  
H 1.217854 -3.877893 -2.194726  
H -0.053053 -2.803641 -2.822494  
H -2.189162 -2.388833 -2.334091  
H -2.305432 -1.069811 -1.132714  
H -3.497851 -2.401836 -1.125318  
H -2.790721 -4.755451 -0.387693  
H -1.156471 -5.053974 0.256443  
H -1.394273 -4.794726 -1.494772  
H -0.381008 -3.731116 2.251439  
H 2.824295 -2.028434 1.016989  
H 3.096501 -3.139216 -0.344453  
H 3.277228 -3.731593 1.335246  
Ni 0.546796 -0.257960 -0.386004  
O -0.594646 -0.069501 1.146932  
P 0.217444 -2.390976 -0.444128  
C 1.009223 2.986089 0.750023  
C 1.557185 4.396066 0.475321  
C 1.758330 2.307692 1.910249  
H -0.061943 3.059844 1.013135  
H 1.563030 4.979473 1.414325  
H 2.841123 2.234688 1.703284  
H 1.370842 1.292671 2.095041  
H 1.639730 2.900742 2.834956  
C 1.802973 -0.564768 -1.741573  
C 2.802392 -2.018808 -3.476538  
C 3.743444 -1.031203 -3.799296  
C 3.726647 0.187362 -3.105818  
C 2.780495 0.416893 -2.092424  
C 2.759990 1.719834 -1.323284  
C 0.005537 2.682799 -2.077392  
C -0.713123 1.639229 -2.949609  
C 0.805797 3.658157 -2.954208  
H 4.485189 -1.210355 -4.585175  
H 4.458307 0.967823 -3.347435  
H 3.100774 2.583398 -1.920581  
H 3.408877 1.669464 -0.427148

H -0.762677 3.233956 -1.503459  
H -1.343587 2.150891 -3.700111  
H -1.356361 0.992081 -2.332552  
H 0.013729 1.003502 -3.483283  
H 1.520831 3.113715 -3.596432  
H 1.370703 4.405437 -2.373913  
H 0.114205 4.202583 -3.622533  
H 0.944656 4.950067 -0.254697  
H 2.595336 4.360338 0.099975  
O -1.937432 1.534210 0.208188  
P 1.005803 1.837806 -0.725045  
C -3.347415 1.678987 2.438014  
H -4.177779 1.304809 1.811185  
H -3.065533 2.679489 2.065988  
C -3.779379 1.765531 3.887228  
H -4.524931 2.586977 3.986037  
H -2.906961 2.028572 4.525319  
O -4.343555 0.524530 4.289595  
C -4.747590 0.554073 5.648939  
H -5.509733 1.341198 5.835965  
H -3.890102 0.735750 6.331629  
H -5.185366 -0.430313 5.878412

### [Pd]OCCOOH

63

C -3.262896 -3.619680 0.628232  
C -1.908148 -2.965798 -1.416396  
H -3.565789 -4.554937 0.123579  
H -0.904776 -2.730341 -1.807230  
H -2.285371 -3.875714 -1.918074  
C -0.387559 2.564451 0.976547  
C 0.883372 2.988675 0.267680  
C 3.102623 1.742626 -1.312997  
C 3.816277 1.236725 -0.048334  
C 3.633633 3.109694 -1.773482  
C 0.511072 2.412083 -2.653331  
C 0.880672 1.489773 -3.828269  
C -1.010971 2.572709 -2.517598  
C 2.196940 -2.102143 -1.252356  
H -0.745498 4.533425 1.812086  
H 3.267644 0.997921 -2.114923  
H 0.963033 3.410297 -2.814554  
H 0.818757 4.018994 -0.127046  
H 1.745106 2.964687 0.961701

H 3.665446 1.920189 0.806472  
H 3.465901 0.227356 0.225329  
H 4.903946 1.186811 -0.237665  
H 4.729439 3.055966 -1.904794  
H 3.196685 3.430170 -2.734190  
H 3.428106 3.894023 -1.023133  
H 1.967556 1.471579 -4.017751  
H 0.554319 0.452592 -3.635517  
H -1.485928 1.595247 -2.325206  
H -1.291311 3.248884 -1.692097  
H -1.426947 2.983440 -3.455221  
O 1.095041 -1.538046 -1.613269  
P 1.242785 1.736011 -1.064257  
Pd 0.164870 -0.151084 -0.234154  
H 0.384835 1.842989 -4.750225  
H 3.478063 -3.355377 -1.836613  
O 2.650067 -2.993983 -2.220037  
C -0.846404 1.221454 0.867161  
C -1.109594 3.501427 1.741010  
C -2.280349 3.127001 2.412321  
C -2.752192 1.812369 2.302713  
C -2.057491 0.866148 1.526168  
C -2.619058 -0.528951 1.344143  
C -0.454815 -2.132234 2.605003  
C 0.858312 -2.910366 2.416478  
C -1.407740 -2.861890 3.563929  
C -1.881039 -3.186322 0.107408  
H -2.828798 3.860327 3.013115  
H -3.677900 1.518555 2.811923  
H -3.205540 -0.875134 2.212636  
H -3.289932 -0.566147 0.463772  
H -0.215429 -1.137878 3.031738  
H 1.547881 -2.405346 1.718537  
H 1.362492 -3.025238 3.392825  
H -0.926441 -2.957340 4.554226  
H -2.363909 -2.330912 3.709850  
H -1.627909 -3.883072 3.208556  
H -1.142285 -3.980301 0.331464  
H -3.279278 -3.800504 1.714205  
O 2.863795 -1.955197 -0.205453  
P -1.189230 -1.650582 0.943757  
H 0.666231 -3.927801 2.028358  
H -2.585125 -2.133383 -1.684977  
H -4.029246 -2.858899 0.396231

66

C 3.357540 -3.534371 0.791213  
C 2.819716 -2.171498 -1.287391  
H 4.315408 -3.867288 0.351471  
H 2.616331 -1.164110 -1.686517  
H 3.736201 -2.568349 -1.761143  
C -2.746815 -0.533345 1.069355  
C -3.153387 0.731209 0.339055  
C -1.875099 2.917758 -1.251119  
C -1.362844 3.633424 0.009894  
C -3.236547 3.462463 -1.713221  
C -2.579162 0.325640 -2.575782  
C -1.658641 0.682236 -3.756003  
C -2.747969 -1.194757 -2.429964  
C 1.931576 1.957248 -1.216348  
H -4.719154 -0.842615 1.915877  
H -1.128844 3.071088 -2.053775  
H -3.575324 0.782546 -2.735812  
H -4.182602 0.672443 -0.059451  
H -3.123503 1.602556 1.020782  
H -2.046795 3.491569 0.865731  
H -0.356016 3.277406 0.284381  
H -1.305480 4.719822 -0.184627  
H -3.168854 4.556366 -1.853477  
H -3.565558 3.021914 -2.669401  
H -4.021558 3.273439 -0.959165  
H -1.635212 1.767697 -3.952961  
H -0.622763 0.351238 -3.564210  
H -1.772127 -1.673391 -2.237873  
H -3.422511 -1.466126 -1.600047  
H -3.164442 -1.614516 -3.363381  
O 1.372797 0.843120 -1.557393  
P -1.892903 1.059068 -0.992034  
Pd -0.023773 -0.046653 -0.158241  
H -2.017727 0.182252 -4.673417  
O 2.795754 2.388744 -2.219078  
C -1.411338 -1.015470 0.964826  
C -3.693491 -1.225066 1.849695  
C -3.336689 -2.388429 2.542914  
C -2.029835 -2.882406 2.439957  
C -1.074575 -2.218153 1.647774  
C 0.310448 -2.807179 1.476721  
C 1.947455 -0.639808 2.684098

### [Pd]-OCOOME



C 2.746868 0.655670 2.463904  
C 2.664020 -1.577986 3.667353  
C 2.992259 -2.145972 0.241727  
H -4.077162 -2.913544 3.155678  
H -1.748939 -3.802465 2.966462  
H 0.647330 -3.376840 2.359962  
H 0.332306 -3.502849 0.615517  
H 0.957041 -0.375433 3.104819  
H 2.248258 1.340611 1.757150  
H 2.878838 1.176024 3.429546  
H 2.779565 -1.065204 4.639612  
H 2.112928 -2.516079 3.851796  
H 3.677238 -1.833411 3.312304  
H 3.801149 -1.431667 0.490159  
H 3.464975 -3.545158 1.886975  
O 1.791224 2.628754 -0.174524  
P 1.456482 -1.405717 1.039787  
H 3.757851 0.438638 2.071169  
H 1.981310 -2.829946 -1.581323  
H 2.592730 -4.281860 0.516383  
C 3.463814 3.624619 -1.932892  
H 4.085651 3.837085 -2.815989  
H 4.100362 3.540631 -1.034998  
H 2.742217 4.444385 -1.772490

### [Pd]-OCOOEt

69

C 3.152282 0.948663 3.714937  
C 2.617671 -1.132099 2.353582  
H 4.111231 0.512146 4.049032  
H 2.415354 -1.532016 1.346301  
H 3.534030 -1.605079 2.751651  
C -2.949500 1.225839 0.711694  
C -3.356901 0.495389 -0.552538  
C -2.077840 -1.087526 -2.743435  
C -1.569095 0.176619 -3.456093  
C -3.438354 -1.551334 -3.288935  
C -2.779171 -2.419579 -0.154100  
C -1.856701 -3.597610 -0.512922  
C -2.948356 -2.276861 1.366544  
C 1.723261 -1.067693 -1.781641  
H -4.922128 2.071457 1.021687  
H -1.329486 -1.887772 -2.899325  
H -3.775021 -2.580312 -0.611432

H -4.385230 0.094874 -0.491896  
H -3.330308 1.177814 -1.423405  
H -2.255792 1.030062 -3.313097  
H -0.563246 0.452683 -3.098707  
H -1.510283 -0.015537 -4.542835  
H -3.370483 -1.688690 -4.383198  
H -3.765438 -2.509315 -2.850846  
H -4.224835 -0.799283 -3.098031  
H -1.832366 -3.791781 -1.598896  
H -0.821292 -3.404940 -0.180955  
H -1.972894 -2.083587 1.845500  
H -3.624590 -1.448742 1.639285  
H -3.363019 -3.211806 1.784699  
O 1.170715 -1.401504 -0.661497  
P -2.094929 -0.833354 -0.883980  
Pd -0.226230 -0.001916 0.224694  
H -2.214655 -4.516827 -0.015412  
O 2.585654 -2.071442 -2.210090  
C -1.613539 1.122218 1.192867  
C -3.896216 2.005974 1.403595  
C -3.539173 2.700042 2.566374  
C -2.231825 2.598424 3.059268  
C -1.276469 1.806580 2.394706  
C 0.108953 1.637307 2.983404  
C 1.749830 2.835252 0.812716  
C 2.550650 2.607925 -0.480745  
C 2.467735 3.820296 1.748015  
C 2.789419 0.397034 2.326821  
H -4.279731 3.312506 3.091729  
H -1.950601 3.125716 3.978788  
H 0.446146 2.522609 3.549736  
H 0.130606 0.779109 3.682774  
H 0.760735 3.257230 0.545543  
H 2.050840 1.900626 -1.164272  
H 2.686860 3.571385 -1.004069  
H 2.586651 4.790198 1.231543  
H 1.915756 4.010068 2.684551  
H 3.479638 3.463580 2.006383  
H 3.599088 0.645183 1.613316  
H 3.256292 2.044777 3.724758  
O 1.576179 -0.029322 -2.457660  
P 1.254696 1.194594 1.583548  
H 3.559912 2.212426 -0.260543  
H 1.778781 -1.425936 3.011442  
H 2.387798 0.672249 4.462147  
C 3.247199 -1.812539 -3.464839

H 3.816358 -0.867463 -3.397530  
H 2.492203 -1.682777 -4.262184  
C 4.160074 -2.995656 -3.748381  
H 4.913349 -3.109800 -2.950698  
H 4.688270 -2.846109 -4.705563  
H 3.581480 -3.932646 -3.813880

### [Pd]-OCOOCH<sub>2</sub>CH<sub>2</sub>OMe

73

C 2.799671 1.249376 3.911882  
C 2.318493 -0.840474 2.542162  
H 3.770151 0.840880 4.248137  
H 2.125696 -1.241483 1.533449  
H 3.244403 -1.295410 2.938914  
C -3.292782 1.431620 0.887492  
C -3.680886 0.703646 -0.384379  
C -2.369633 -0.866173 -2.565531  
C -1.856331 0.398843 -3.273629  
C -3.724468 -1.330458 -3.124900  
C -3.079516 -2.205778 0.017754  
C -2.146685 -3.376600 -0.337966  
C -3.255718 -2.066393 1.537987  
C 1.430394 -0.781546 -1.580311  
H -5.277872 2.250529 1.189807  
H -1.619757 -1.666132 -2.715169  
H -4.072184 -2.373525 -0.443995  
H -4.706862 0.295194 -0.338413  
H -3.648173 1.390025 -1.251999  
H -2.545186 1.251265 -3.135136  
H -0.853922 0.678468 -2.909197  
H -1.789515 0.207579 -4.360080  
H -3.644352 -1.471409 -4.217881  
H -4.057830 -2.286727 -2.687682  
H -4.512188 -0.576874 -2.945433  
H -2.114616 -3.568980 -1.424037  
H -1.114666 -3.177500 0.000620  
H -2.283179 -1.867622 2.020571  
H -3.937986 -1.242915 1.809540  
H -3.665760 -3.004690 1.953105  
O 0.859550 -1.143113 -0.479698  
P -2.404673 -0.613033 -0.706386  
Pd -0.552546 0.238727 0.411911  
H -2.501068 -4.299068 0.156060  
O 2.290915 -1.781277 -2.026899

C -1.959019 1.341595 1.377238  
C -4.253617 2.195629 1.577768  
C -3.912332 2.887137 2.746851  
C -2.606840 2.799315 3.247300  
C -1.637401 2.023346 2.584343  
C -0.252239 1.869799 3.177751  
C 1.365403 3.116416 1.018944  
C 2.192220 2.920145 -0.262857  
C 2.038094 4.119301 1.968712  
C 2.456505 0.691966 2.521325  
H -4.663820 3.487022 3.271191  
H -2.337809 3.325239 4.171227  
H 0.069712 2.755159 3.752535  
H -0.219523 1.004984 3.868548  
H 0.368562 3.509933 0.737386  
H 1.724372 2.200740 -0.956180  
H 2.305495 3.889789 -0.780270  
H 2.130184 5.095413 1.458588  
H 1.468808 4.284701 2.899374  
H 3.058382 3.795993 2.237493  
H 3.262747 0.960979 1.811633  
H 2.870919 2.348046 3.924007  
O 1.302096 0.275522 -2.230562  
P 0.905710 1.458577 1.777282  
H 3.209892 2.555679 -0.029422  
H 1.485275 -1.154376 3.197771  
H 2.041271 0.949408 4.656205  
C 3.000609 -1.467620 -3.236106  
H 3.704202 -0.632884 -3.061002  
H 2.294410 -1.152874 -4.025497  
C 3.751917 -2.706235 -3.680450  
H 4.156081 -2.531020 -4.703334  
H 3.052165 -3.568927 -3.742353  
O 4.805265 -2.976665 -2.764622  
C 5.520981 -4.146208 -3.125427  
H 6.317019 -4.283446 -2.376450  
H 5.984232 -4.054461 -4.131939  
H 4.869153 -5.046088 -3.127672
